# Supplementary material for: The CCR4-NOT complex is a tumor suppressor in Drosophila melanogaster eye cancer models
Source: Springer Nature journal article supplement (doi:10.1186/s13045-018-0650-0), 2018-08-25

# Figure S2

## A ey-Gal4 genetic background

*Not1* down-regulation

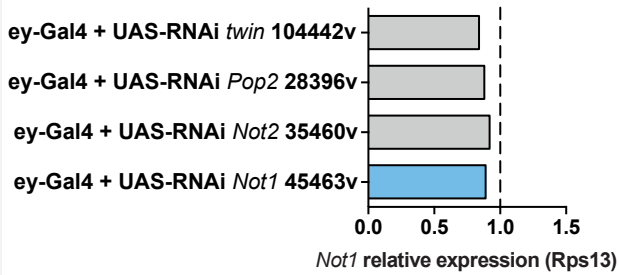

*Not2* down-regulation

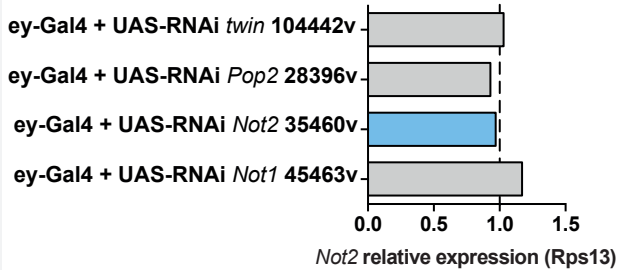

*Pop2* down-regulation

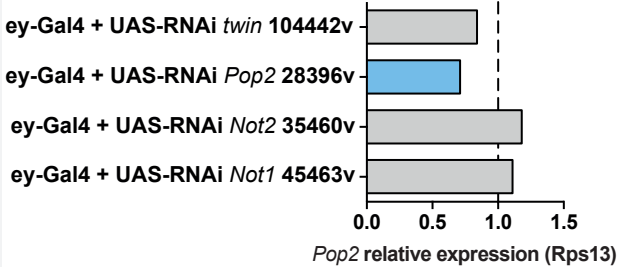

*twin* down-regulation

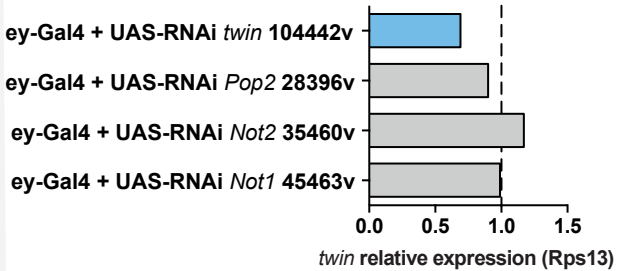

## B Sensitized genetic background

*Not1* down-regulation

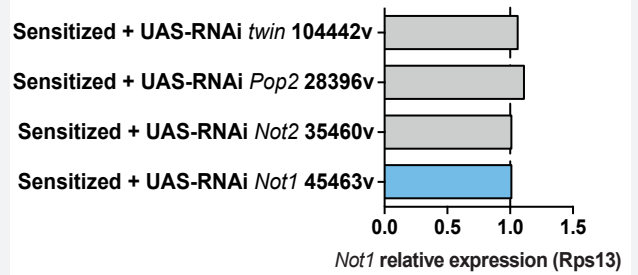

*Not2* down-regulation

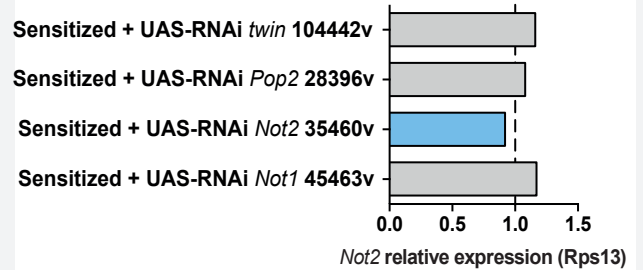

*Pop2* down-regulation

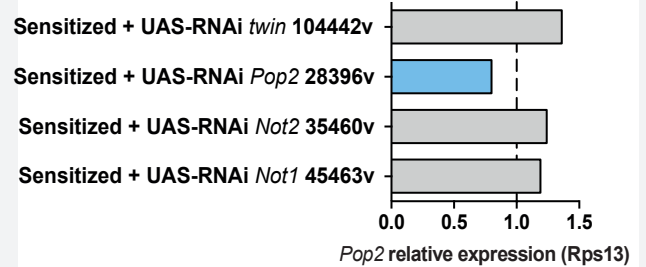

*twin* down-regulation

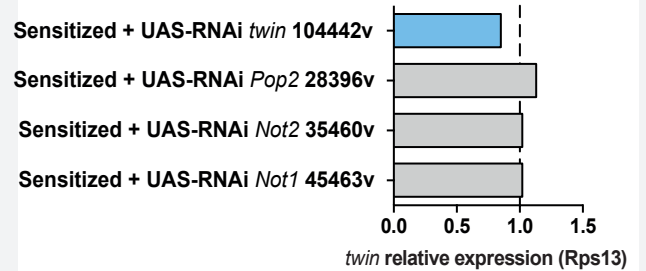

Supplement: MOESM3 [file 16073018]
