# Supplementary material for: The CCR4-NOT complex is a tumor suppressor in Drosophila melanogaster eye cancer models
Source: Springer Nature journal article supplement (doi:10.1186/s13045-018-0650-0), 2018-08-25

**Figure S4**

**A**

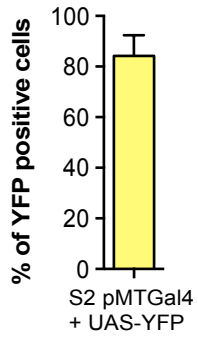

**B**

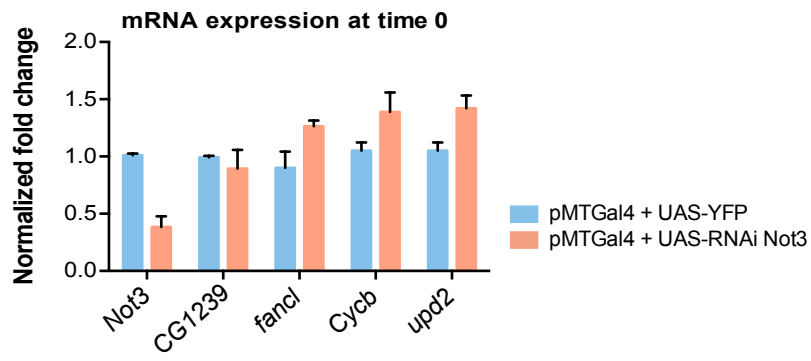

**C**

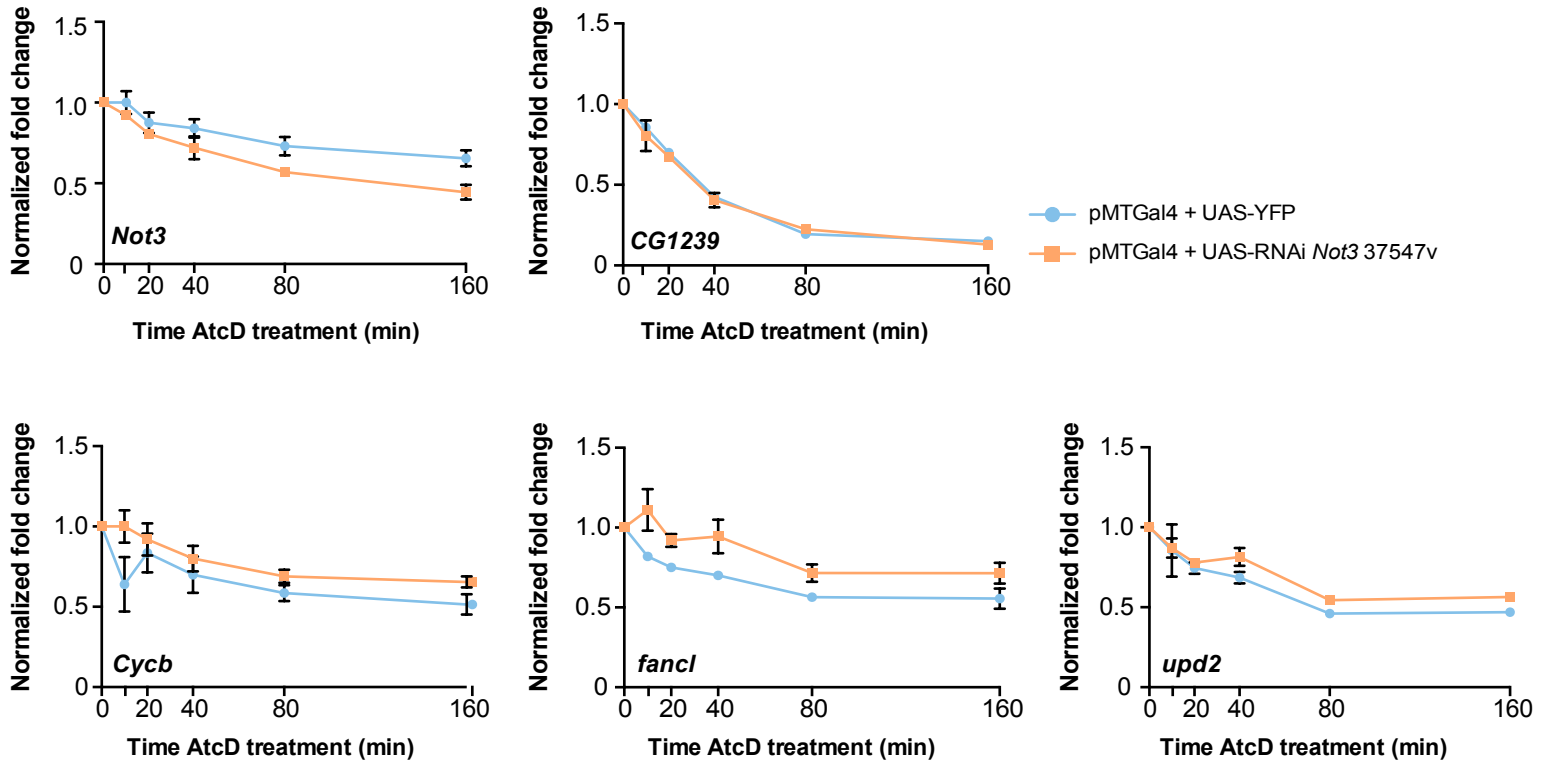

Supplement: MOESM5 [file 16073018]
